# Supplementary material
Source: PubMed Central journal article supplement (PMC8063490)
Supplement: NIHMS1676722-supplement-S1-4_movie_legend.pdf [file NIHMS1676722-supplement-S1-4_movie_legend.pdf]

## **Supplemental Movie legends**

### **Movie S1, Related to Figure 2**

IVM movie of CF(DA) transport in the WT mouse liver. The CV-PV axis is oriented as indicated in Figure 2B. CFDA was injected 1 min after acquisition start. Scale bar, 20  $\mu\text{m}$ .

### **Movie S2, Related to Figure 5**

IVM movie of bile canaliculus contractility in a Lifeact-EGFP mouse liver shown as still images in Figure 5A. Scale bar 2  $\mu\text{m}$ .

### **Movie S3, Related to Figure 5**

IVM movie of CF(DA) transport in the liver of control and Fasudil-treated mice. CV-PV axis is oriented as indicated in Figure 5D. CFDA was injected at 1 min. Scale bar, 25  $\mu\text{m}$ .

### **Movie S4, Related to Figure 7**

IVM movie of CF(DA) transport in the liver of control and APAP-treated mice. CV-PV axis is oriented as indicated in Figure 7C. CFDA was injected at 1 min. Scale bar, 25  $\mu\text{m}$ .
